# Supplementary material for: Tumor factors stimulate lysosomal degradation of tumor antigens and undermine their cross-presentation in lung cancer
Source: PubMed Central journal article supplement (PMC9636202; doi:10.1038/s41467-022-34428-w), 2022-11-04
Supplement: 41467_2022_34428_MOESM1_ESM.pdf [file 41467_2022_34428_MOESM1_ESM.pdf]

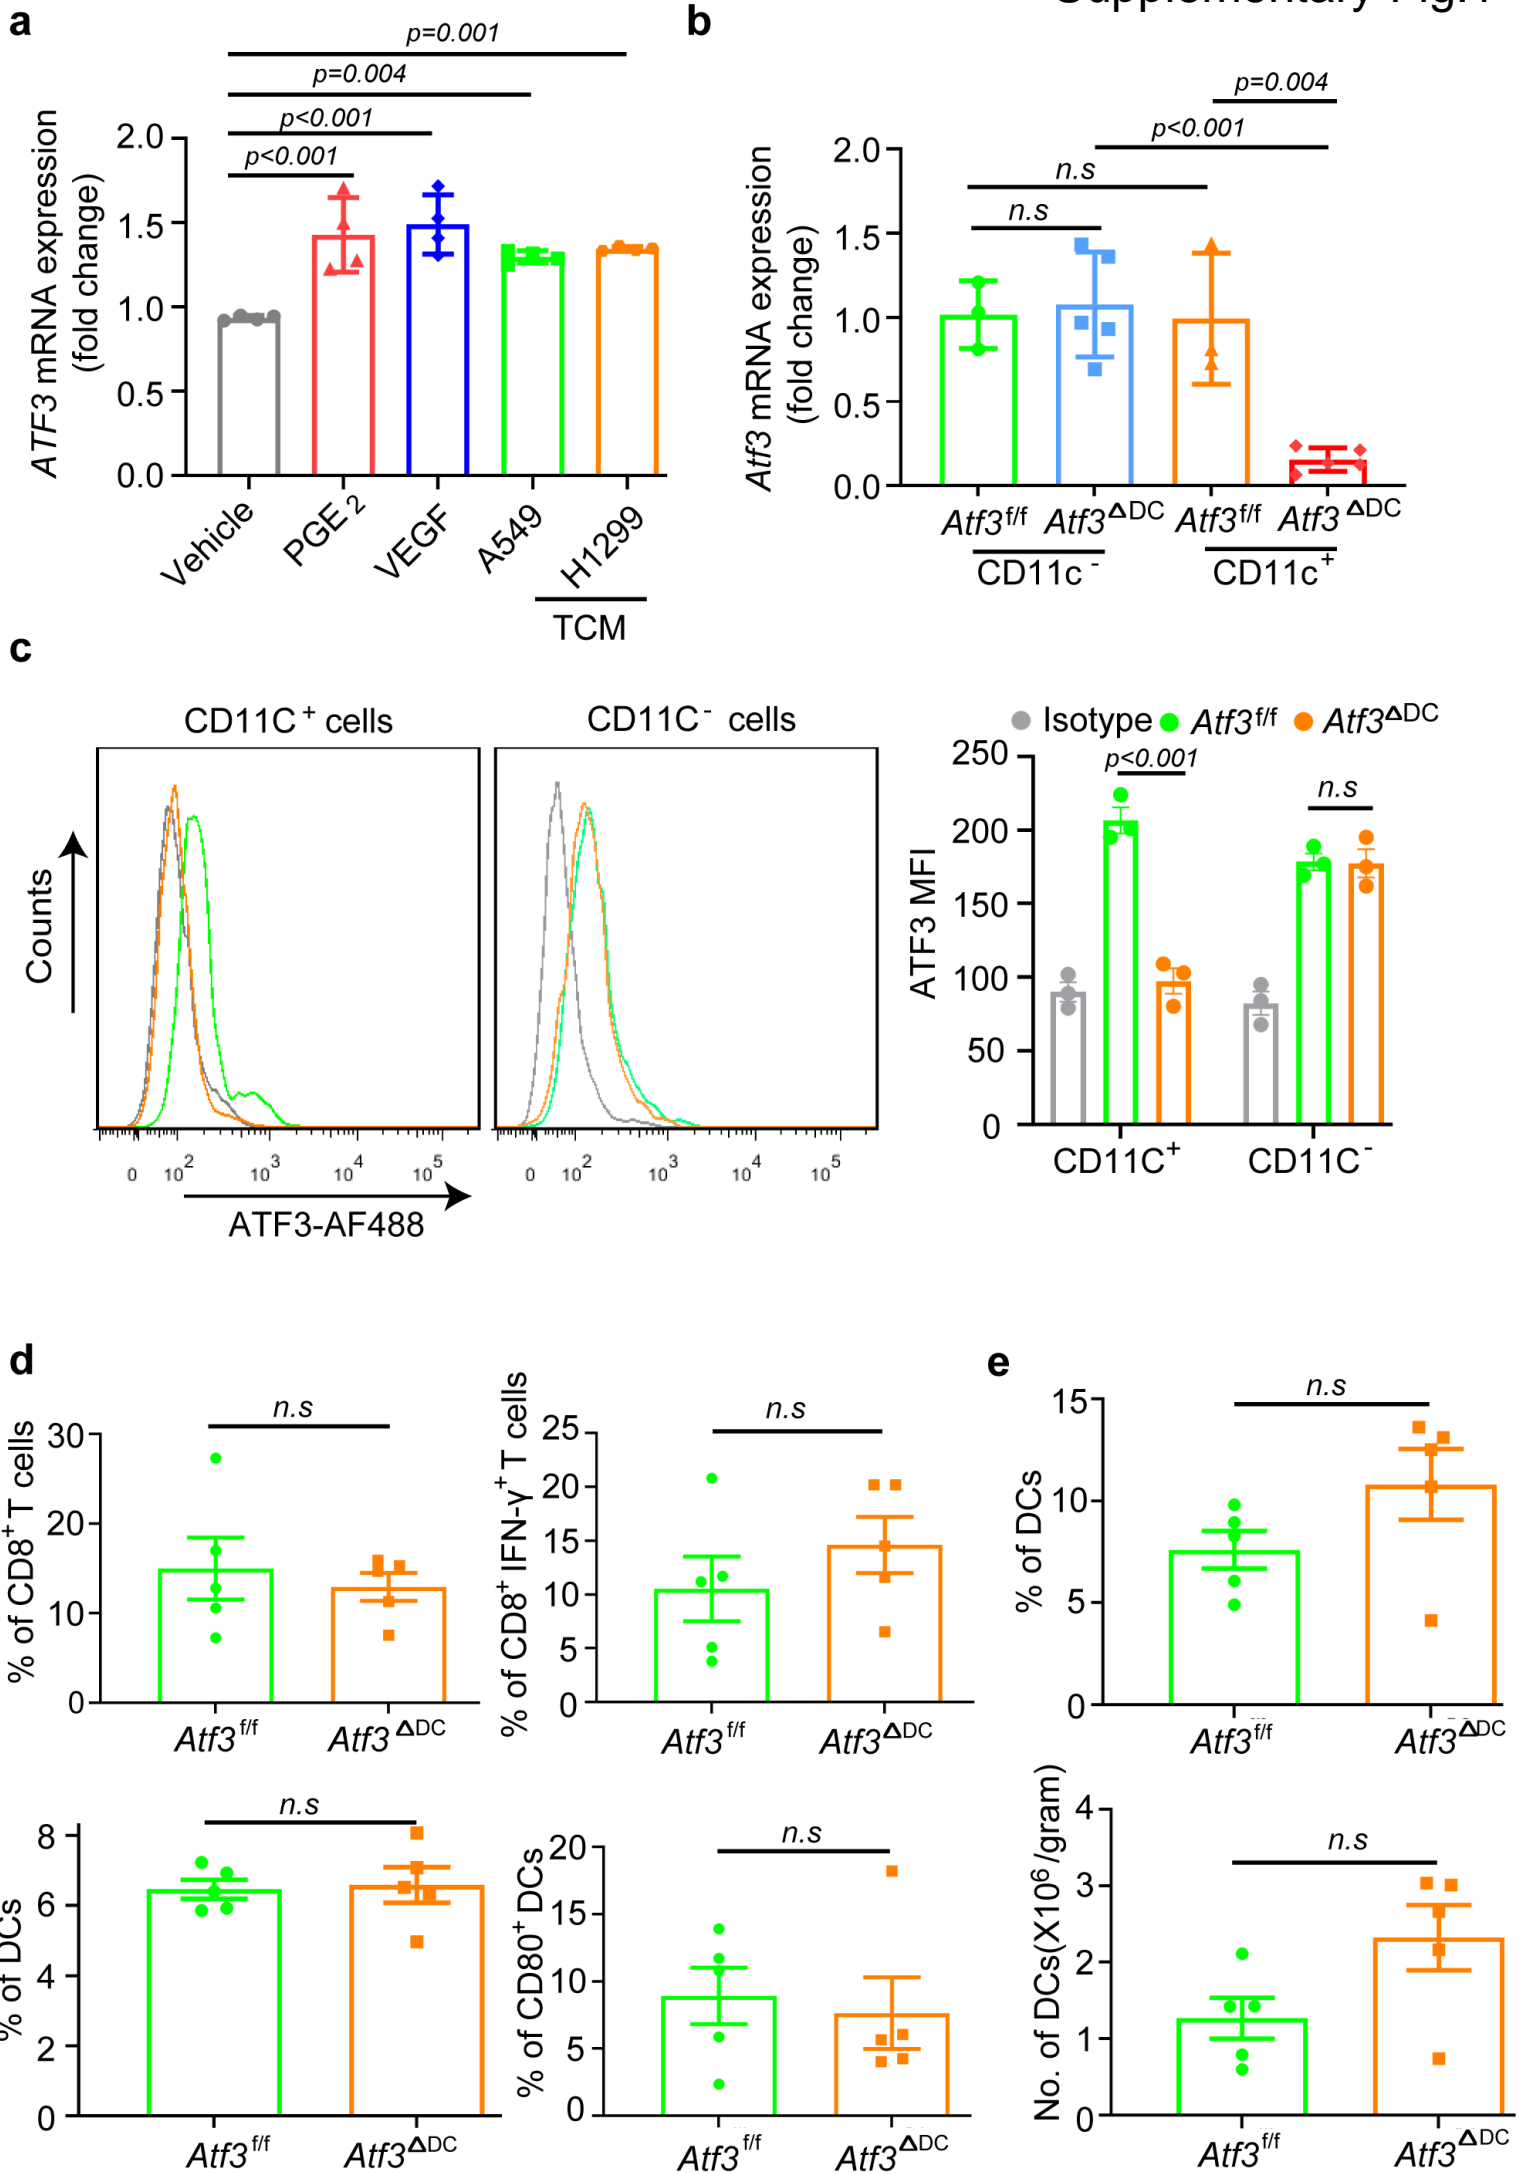

## Supplementary Figure 1. Tumor microenvironment factors-induced ATF3 in DCs promotes tumor growth.

- a. qPCR analysis of *ATF3* mRNA in human monocytes treated with vehicle, PGE<sub>2</sub> (10 ng/mL), VEGF (20 ng/mL), or TCM from A549 or H1299 cells (75%, v/v) for 2 hr. *n* = 4 biologically independent samples.
- b. qPCR analysis of *ATF3* mRNA levels in CD11c<sup>+</sup> and CD11c<sup>-</sup> splenic myeloid cells from *Atf3<sup>fl/fl</sup>* and *Atf3<sup>ΔDC</sup>* mice. *n* = 3 mice for *Atf3<sup>fl/fl</sup>* group and *n*=5 mice for *Atf3<sup>ΔDC</sup>* group.
- c. Flow cytometry analysis of ATF3 expression in CD11c<sup>+</sup> and CD11c<sup>-</sup> cells isolated from *Atf3<sup>fl/fl</sup>* and *Atf3<sup>ΔDC</sup>* mice. *n*=3 mice per group.
- d. Flow cytometry analysis of percentage of CD8<sup>+</sup> T cells or DCs and their corresponding absolute cell number in spleens of *Atf3<sup>fl/fl</sup>* and *Atf3<sup>ΔDC</sup>* mice. *n*=5 mice per group.
- e. Flow-cytometry determination of the percentage and quantitative estimates of intratumoral DCs from the experiment described in panel 1f. *n* = 5 tumors in each group.

Data presented as mean±SEM. Statistical analysis was performed using 2-tailed Students' t test (a, c, d and e) or 1-way ANOVA with Tukey's multiple comparison test (b). n.s., no significant. Source data are provided as a Source Data file.

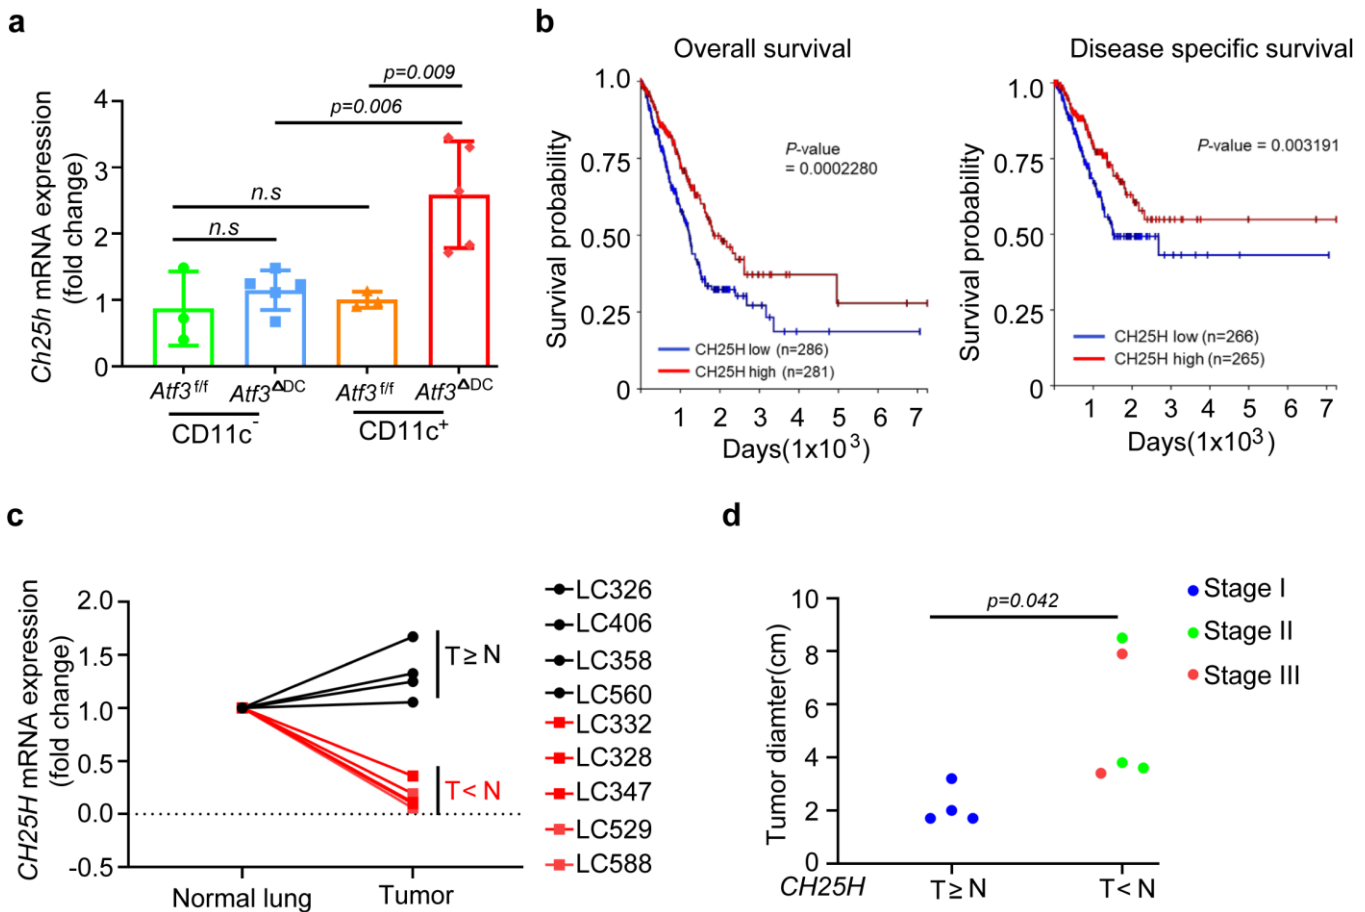

### Supplementary Figure 2. Downregulation of CH25H in human and mouse lung tumors.

- qPCR analysis of *Ch25h* mRNA levels in CD11c<sup>+</sup> and CD11c<sup>-</sup> splenic myeloid cells from *Atf3<sup>ff</sup>* and *Atf3<sup>ΔDC</sup>* mice. *n* = 3 mice for *Atf3<sup>ff</sup>* group and *n*=5 mice for *Atf3<sup>ΔDC</sup>* group. Data presented as mean ± SEM; statistical analysis was performed using 1-way ANOVA with Tukey's multiple comparison test.
- Overall and disease specific survival among patients with lung adenocarcinoma with high or low expression of *CH25H* from TCGA Lung Adenocarcinoma (LUAD) database.
- Comparisons of *CH25H* expression in CD14<sup>+</sup> monocytes from paired primary lung tumors and distant lung tissues from the same NSCLC patients. The samples were divided into two separate subsets based on the expression level of *CH25H*: a comparable *CH25H* levels within tumor and normal lungs (*T* ≥ *N*) and a notably lower level of *CH25H* in intratumoral CD14<sup>+</sup> monocytes compared to cells isolated from normal lungs (*T* < *N*).
- Comparisons of tumor size and stage of human NSCLC cancer patients described in panel S2c. *n*=4 for stage I patients, *n*=3 for stage II patients and *n*=2 for stage III patients. Statistical analysis was performed using 2-tailed Students' *t* test.

Source data are provided as a Source Data file.

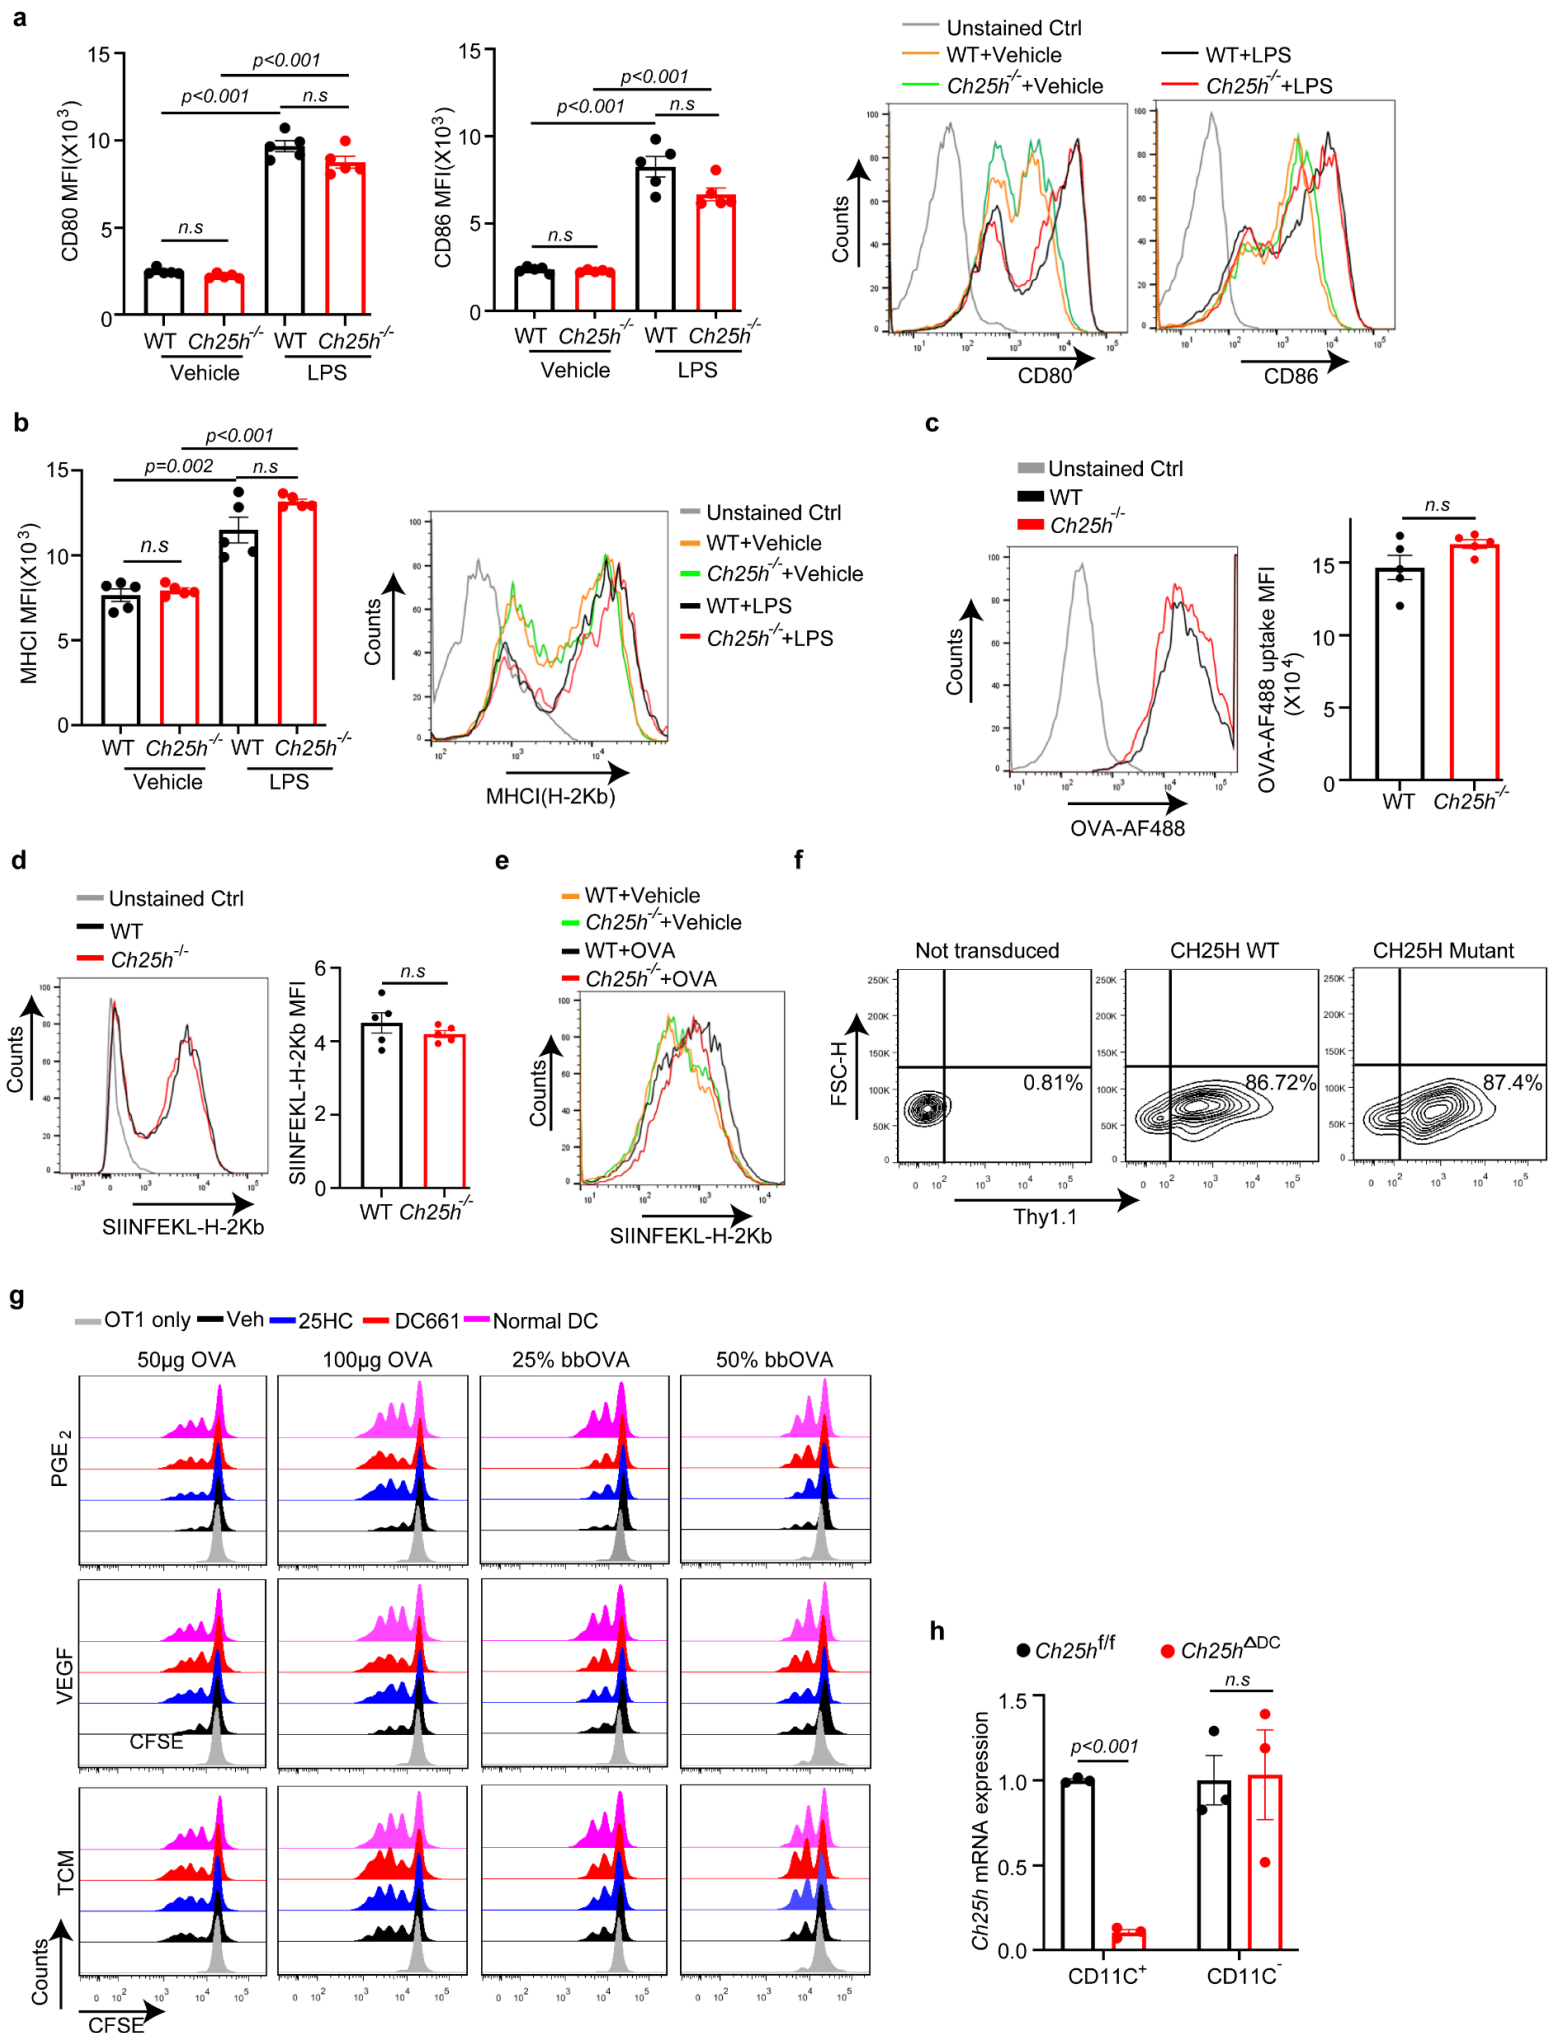

### Supplementary Figure 3. CH25H expression in DCs enables efficient antigen cross-presentation otherwise inhibited by factors of tumor microenvironment

- a. Flow cytometry analysis of CD80 and CD86 expression on DCs in WT and *Ch25h*<sup>-/-</sup> mice pretreated with or without LPS (100 ng/mL, 18 hr); *n* = 5 biologically independent samples. LPS, lipopolysaccharide; MFI, median fluorescence intensity.
- b. Representative histograms and quantitative estimates of MHC I levels on DCs pre-treated with or without LPS (100ng/mL, 18 hr) from indicated mice. *n* = 5 biologically independent samples.
- c. Uptake of OVA-AF488 (100 µg/ml, 1 hr) in DCs from WT and *Ch25h*<sup>-/-</sup> mice. *n* = 5 biologically independent samples.
- d. Flow cytometry analysis of SIINFEKL-H-2Kb formation on DCs from indicated mice after treatment of OVA-derived short peptide (SIINFEKL, 1 µg/mL, 1 hr). *n* = 5 biologically independent samples
- e. Representative histograms of experiments described in Figure 3a showing SIINFEKL-bound H-2kb expression on DCs from indicated mice after treatment of OVA protein (200 µg/mL, 18hr).
- f. Relative expression of Thy1.1 in *Ch25h*<sup>-/-</sup> DCs transduced with MSCV-Ch25h-IRES-Thy1.1 retroviruses for expression of CH25H<sup>WT</sup> or inactive CH25H<sup>H242,243Q</sup> mutant.
- g. Representative histograms of experiments described in Figure 3f-g. Proliferation was assessed by flow cytometry in CFSE-labeled OT-I T cells co-culture (10:1) for 72 hr with CD11c<sup>+</sup> myeloid cells pulsed with complete OVA (50 µg and 100 µg, 6 hr) or beads-bound OVA (25% and 50%, 1 hr) pretreated with PGE<sub>2</sub> (10 ng/mL), VEGF (20 ng/mL) or TCM from LLC cells (75%, v/v) for 24 hr with or without the treatment of 25HC (50nM) or DC661 (5µM) for 4 hr.
- h. qPCR analysis of *Ch25h* mRNA levels in CD11c<sup>+</sup> and CD11c<sup>+</sup> splenic myeloid cells from indicated *Ch25h*<sup>+/+</sup> and *Ch25h*<sup>ΔDC</sup> mice. *n* = 3 mice per group.

Data presented as mean±SEM. Statistical analysis was performed using 1-way ANOVA with Tukey's multiple-comparison test (a and b) or 2-tailed Students' t test (c, d and h). n.s., no significant. Source data are provided as a Source Data file.

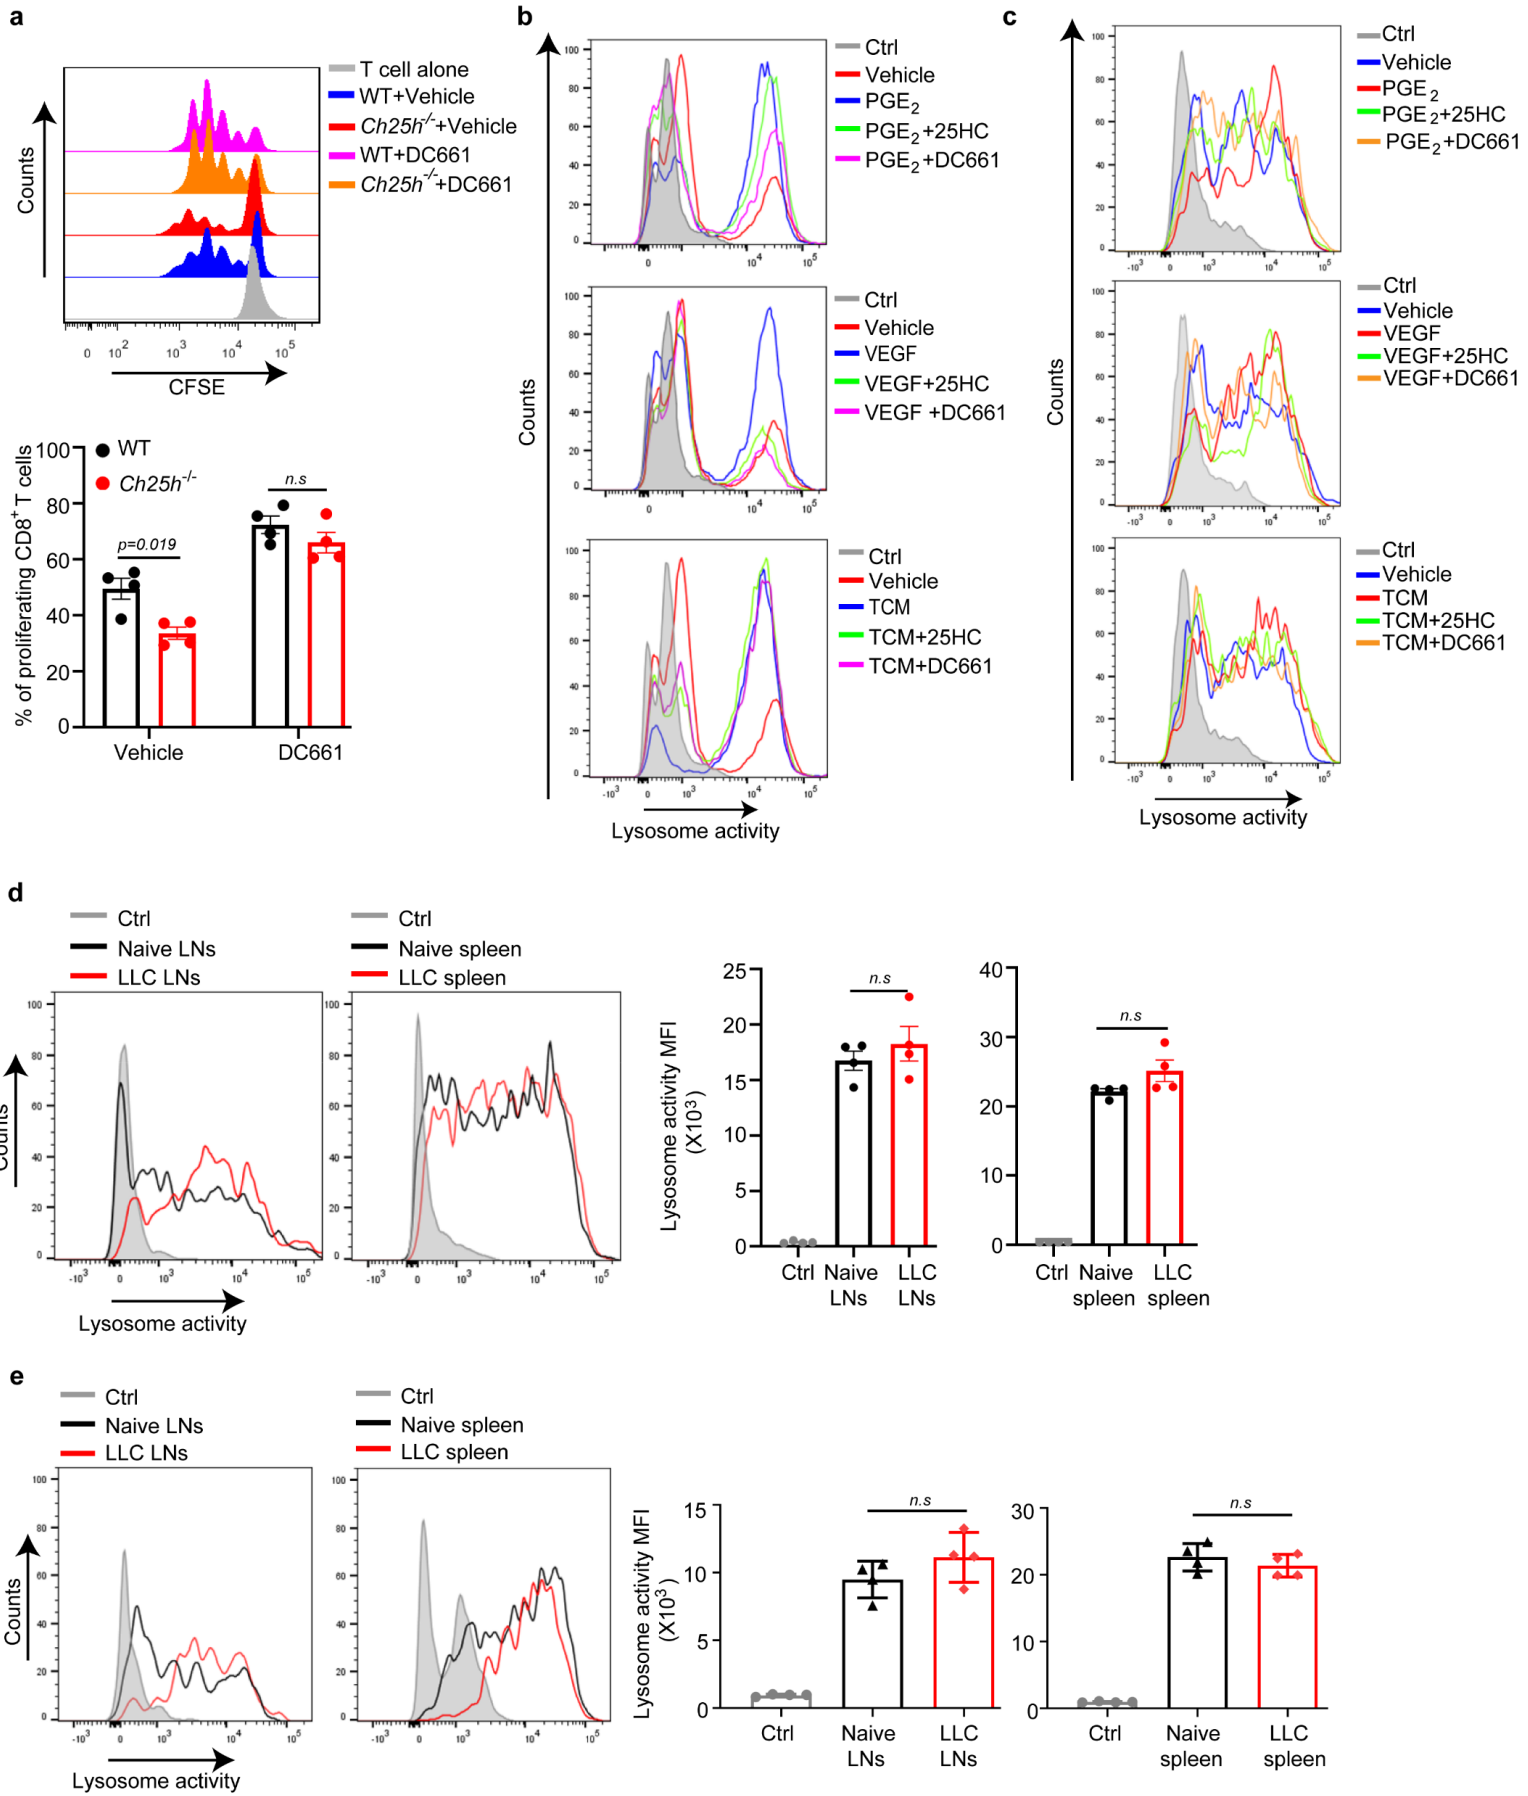

#### **Supplementary Figure 4. CH25H expression in DCs acts to limit the lysosomal degradation otherwise induced by factors of tumor microenvironment**

- a. T cells proliferation was assessed by flow cytometry assessment of dilution of CFSE. CFSE-labeled OT-I cells were co-cultured (10:1 for 72hr) with indicated DCs pulsed with soluble OVA (200  $\mu$ g/ml, 6 hr) pre-treated with or without DC661(5 $\mu$ M, 4 hr). n=4 biologically independent samples.
- b. Representative histogram of 4a. Lysosome activity in human CD14<sup>+</sup> monocytes pretreated with PGE<sub>2</sub> (10 ng/mL), VEGF (20 ng/mL) or medium conditioned from A549 cells (75%, v/v) for 24 hr with or without the treatment of 25HC (4 $\mu$ M) or DC661 (100nM).
- c. Representative histogram of 4b. Lysosome activity in bone marrow CD11c<sup>+</sup> cells pretreated with PGE<sub>2</sub> (10 ng/mL), VEGF (20 ng/mL) or medium conditioned from LLC cells (75%, v/v) for 24 hr with or without the treatment of 25HC (4 $\mu$ M) or DC661 (100nM).
- d. Representative histogram of lysosome activity (DQ-OVA fluorescence) in total DCs from lung-draining LNs or spleen from naïve mice or LLC inoculated mice (*i.v.*, 1 $\times$ 10<sup>6</sup> cells/mouse, 2 weeks). n=4 biologically independent samples.
- e. Representative of lysosome activity (DQ-OVA fluorescence) in CD103<sup>+</sup>CD11b<sup>-</sup>DCs of lung-draining LNs or spleen from naïve mice or LLC *i.v.* inoculated mice. n=4 biologically independent samples.

Data presented as mean $\pm$ SEM. Statistical analysis was performed using 2-tailed Students' t test. n.s., no significant. Source data are provided as a Source Data file.

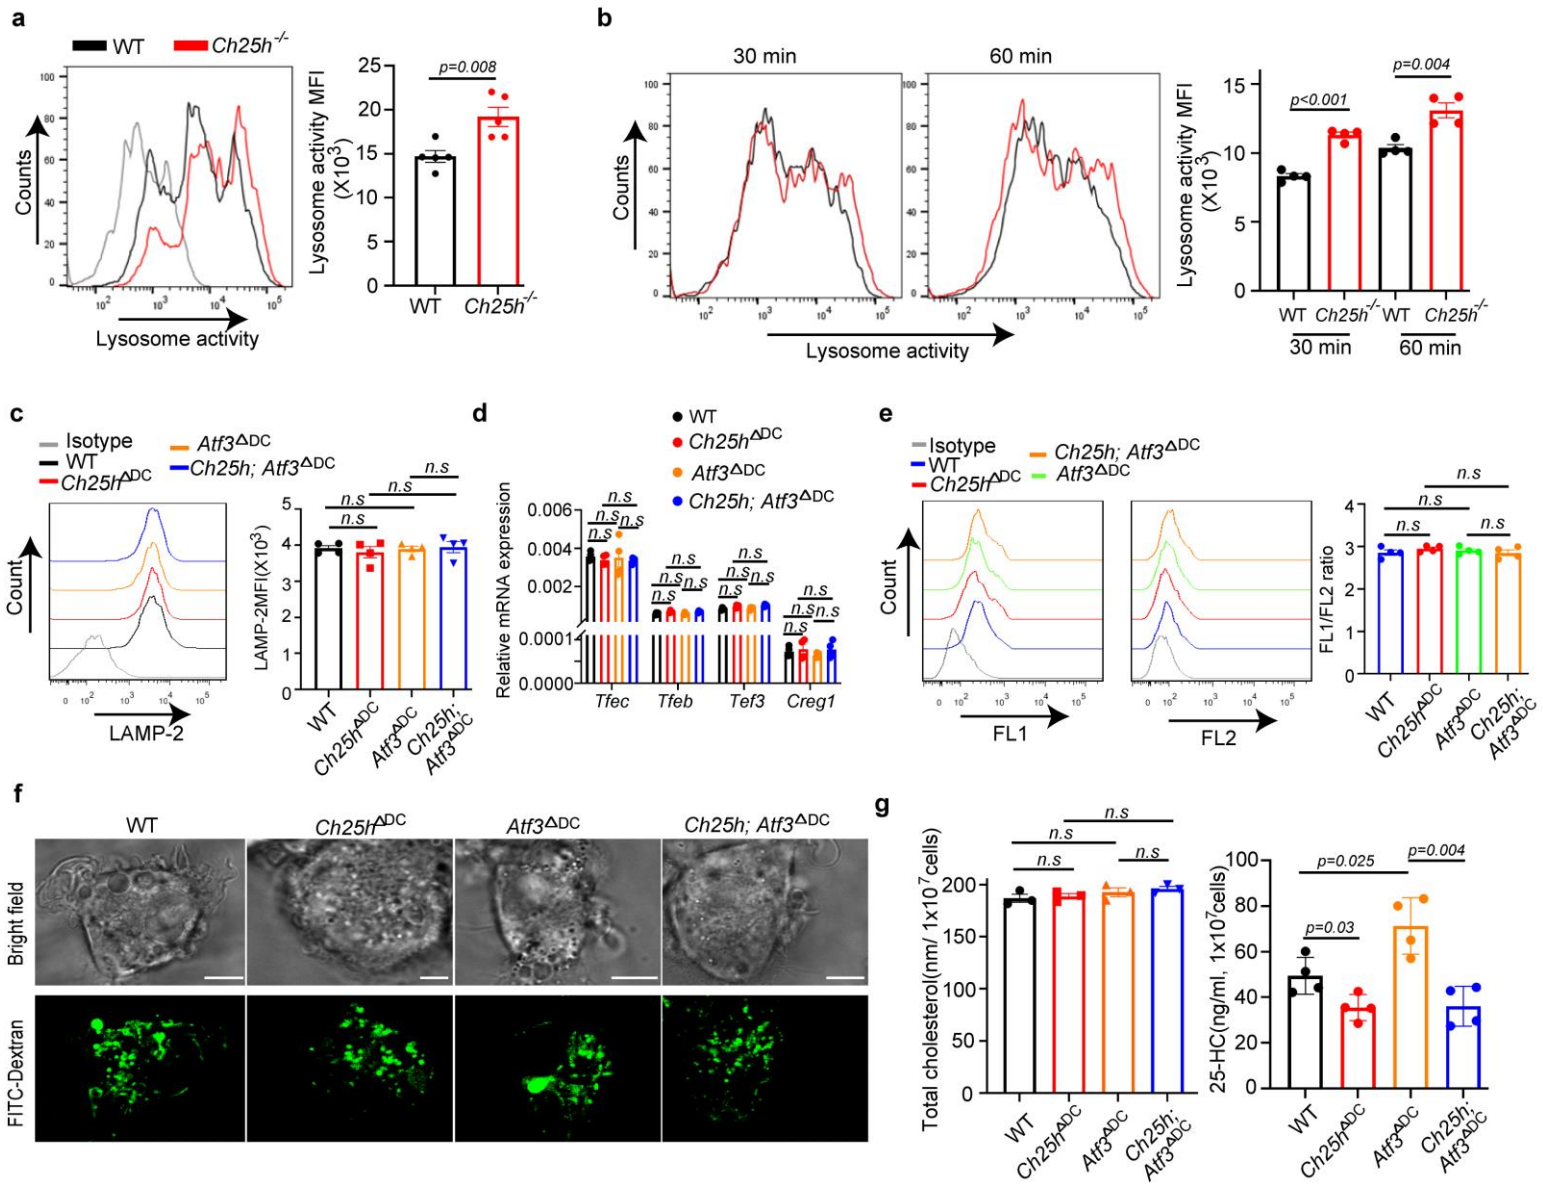



## Supplementary Figure 5. CH25H regulates lysosomal proteolysis

- a. Representative histograms and quantification of lysosome activity assessed by fluorescence of self-quenched substrate (BioVision, Cat. No. K448-50) in indicated DCs treated as indicated. n=5 biologically independent samples.
- b. Representative histograms and quantification of lysosome activity assessed by fluorescence of DQ-OVA fluorescence in indicated DCs incubated with substrate for 30 min or 60 min. n=4 biologically independent samples.
- c. Flow cytometry analysis of Lysosome marker (LAMP-2) in DCs isolated from spleen of indicated mice. n=4 biologically independent samples.
- d. qPCR analysis of mRNA levels of indicated lysosome biogenesis-related genes in DCs isolated from spleens of indicated mice. n=4 biologically independent samples.
- e. Flow cytometry analysis of lysosome pH in DCs isolated from spleen of indicated mice was performed as described in Methods. Quantification of the ratios of fluorescence intensity in FL1 versus FL2 channels is shown on the right. n=4 biologically independent samples.
- f. Representative bright field and immunofluorescence images of distribution of FITC-Dextran (10kD, 0.1 mg/ml, Sigma, Cat. No. FD10S) in lysosomes of DCs isolated from spleens of indicated mice. Similar results were obtained from three independent experiments. Scale bar, 10 $\mu$ m.
- g. ELISA-based analyses of total cholesterol (n=3 mice per group) and 25HC (n=4 mice per group) in DCs isolated from spleens of indicated mice.

Data presented as mean $\pm$ SEM. Statistical analysis was performed using 2-tailed Students' t test. n.s., no significant. Source data are provided as a Source Data file.

# Supplementary Fig.6

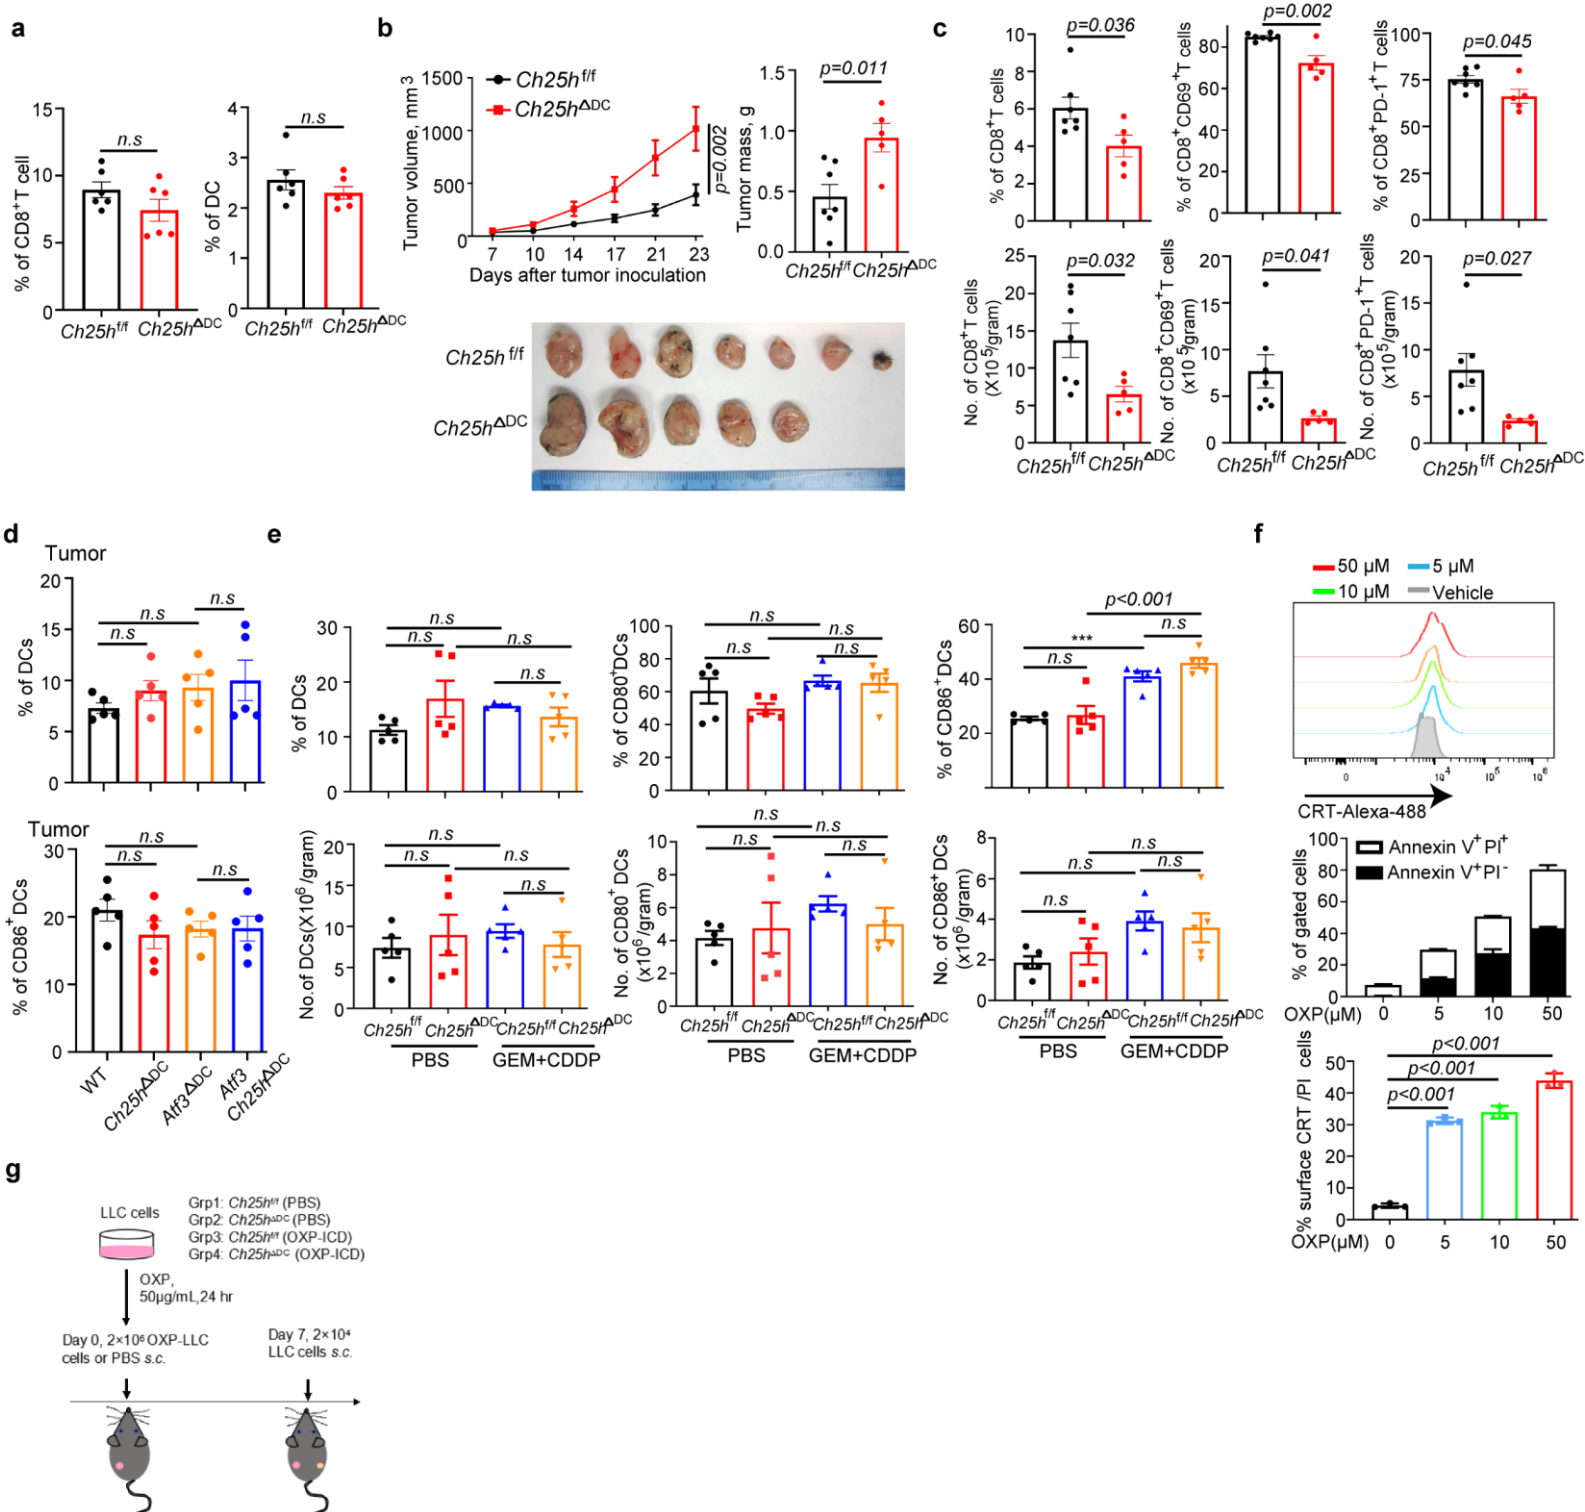

## Supplementary Figure 6. Downregulation of CH25H in DCs undermines the anti-tumor immunity and accelerates tumor growth.

- a. Percentage of CD8<sup>+</sup> T cells and DCs in CD45<sup>+</sup> cells from naive WT and *Ch25h*<sup>ADC</sup> mice, as determined by flow cytometry. *n* = 6 mice per group.
- b. Growth of MC38 tumors after subcutaneous injection of 2.5×10<sup>5</sup> MC38 tumor cells into WT (*n*=7 mice) and *Ch25h*<sup>ADC</sup> mice (*n*=5 mice). Representative images and quantification of MC38 tumor size and weight were taken and measured at day 24 after injection of MC38 cells.
- c. Flow-cytometry determination of the percentage and quantitative estimates of intratumoral CD8<sup>+</sup> T cells and CD69<sup>+</sup>, PD1<sup>+</sup> in CD8<sup>+</sup> T cells after s.c. inoculated with MC38 cells. *n* = 7 mice for *Ch25h*<sup>ff</sup> group and *n*=5 for *Ch25h*<sup>ADC</sup> groups.
- d. Flow-cytometry determination of the percentage and CD86 expression of DCs isolated from LLC tumors in the experiment described in Figure 6e. *n*=5 mice for each group.
- e. Flow-cytometry determination of the percentage and quantitative estimates of intratumoral DCs, CD80<sup>+</sup>, CD86<sup>+</sup> DCs in *Ch25h*<sup>ff</sup> and *Ch25h*<sup>ADC</sup> mice with PBS or GEM+CDDP treatment. *n* = 5 tumors in each treatment group.
- f. Flow cytometry analysis of apoptotic LLC cells and percentage of externalized CRT on LLC cells after treatment of OXP (5-50μM, 24 hr). *n* = 3 per group. OXP, oxaliplatin; CRT, calreticulin.
- g. Tumor vaccine treatment scheme in a therapeutic setting. Mice of indicated genotypes were immunized with the oxaliplatin-pretreated (50μM, 24 hr) LLC tumor cells (dose of 2×10<sup>6</sup> per mouse, *n* = 5 per genotype) on day 0. Another group for each genotype mice (*n* = 5 per genotype) received no vaccination at same day as no treatment control. On day 7 day, all mice were challenged with 1.5×10<sup>4</sup> non-treated LLC cells.

Data presented as mean±SEM. Statistical analysis was performed using 2-tailed Students' t test (a, b, c and f) or 1-way ANOVA with Tukey's multiple-comparison test (d and e) or 2-way ANOVA with multiple comparison (b). n.s., no significant. Source data are provided as a Source Data file.

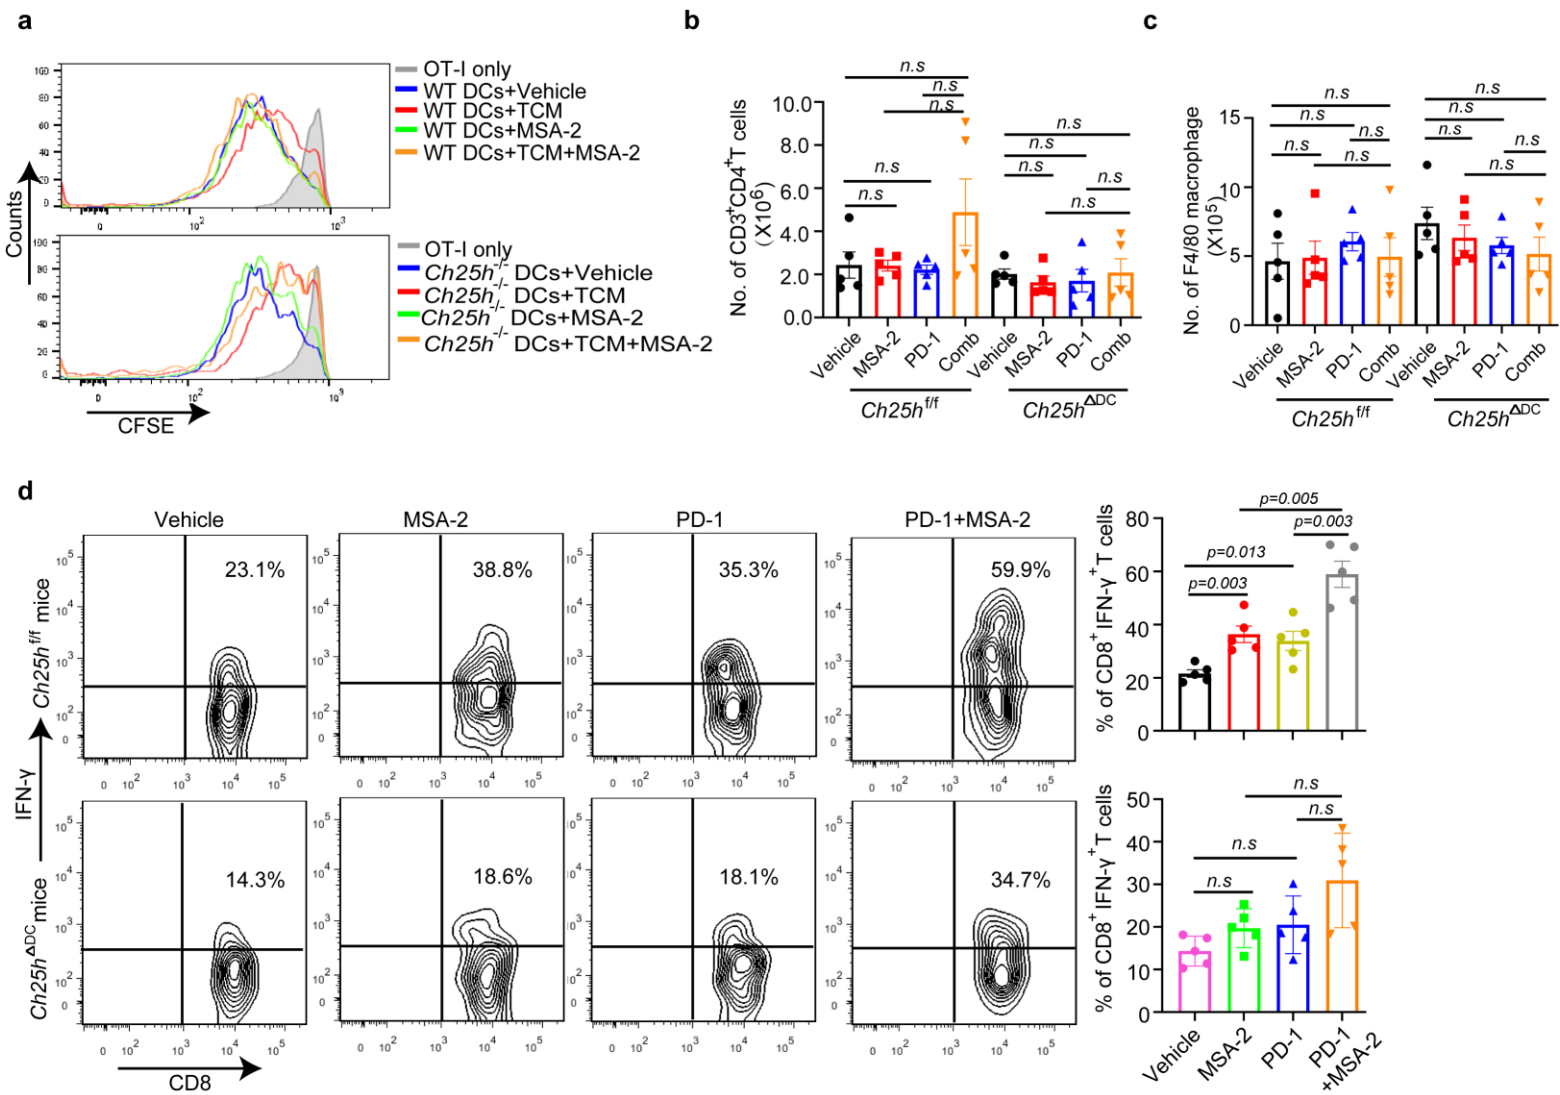

### Supplementary Figure 7. STING agonist acts to maintain CH25H expression in DCs to increase intratumoral immune infiltration and elicit anti-tumor therapeutic effects.

- Representative histogram for data shown in Figure 7c. Proliferation was assessed by flow cytometry in CFSE labeled OT-I T cells co-cultured (10:1) with OVA-pulsed (200  $\mu$ g/mL, 6 hr) WT or *Ch25h*<sup>-/-</sup> BMDCs for 72 hr. BMDCs were pre-treated with medium conditioned from LLC cells (70%, v/v) for 20 hr with or without the treatment of MSA-2 (10  $\mu$ M) for 16 hr before OVA pulse.
  - Flow determination of number of CD3<sup>+</sup>CD4<sup>+</sup> T cells in LLC tumors grown in *Ch25h*<sup>f/f</sup> or *Ch25h*<sup>ADC</sup> mice with indicated treatment described in Figure 7d. n=5 mice per group.
  - Flow determination of number of F4/80<sup>+</sup> macrophage in LLC tumors grown in *Ch25h*<sup>f/f</sup> or *Ch25h*<sup>ADC</sup> mice with indicated treatment described in Figure 7d. n=5 mice per group
  - Flow determination of number of CD8<sup>+</sup>IFN- $\gamma$ <sup>+</sup> T cells in LLC tumors grown in *Ch25h*<sup>f/f</sup> or *Ch25h*<sup>ADC</sup> mice with indicated treatment described in Figure 7d. n=5 mice per group
- Data presented as mean $\pm$ SEM. Statistical analysis was performed using 2-tailed Student's t test. n.s., no significant. Source data are provided as a Source Data file.

a

DC analysis in Tumor

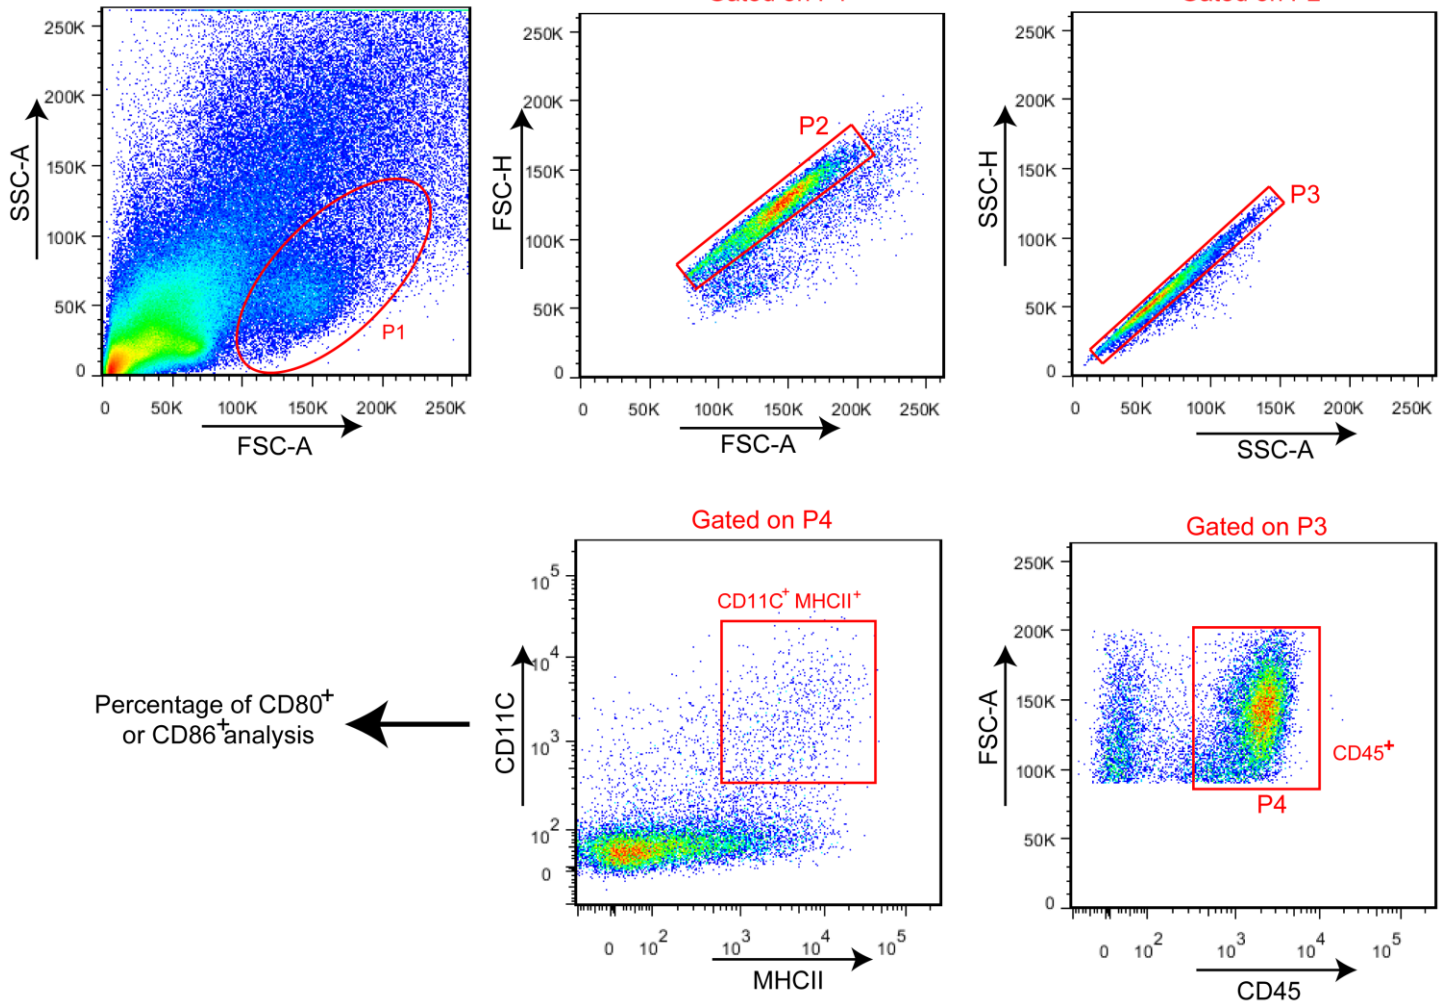

b

CD8 T cells analysis in tumor

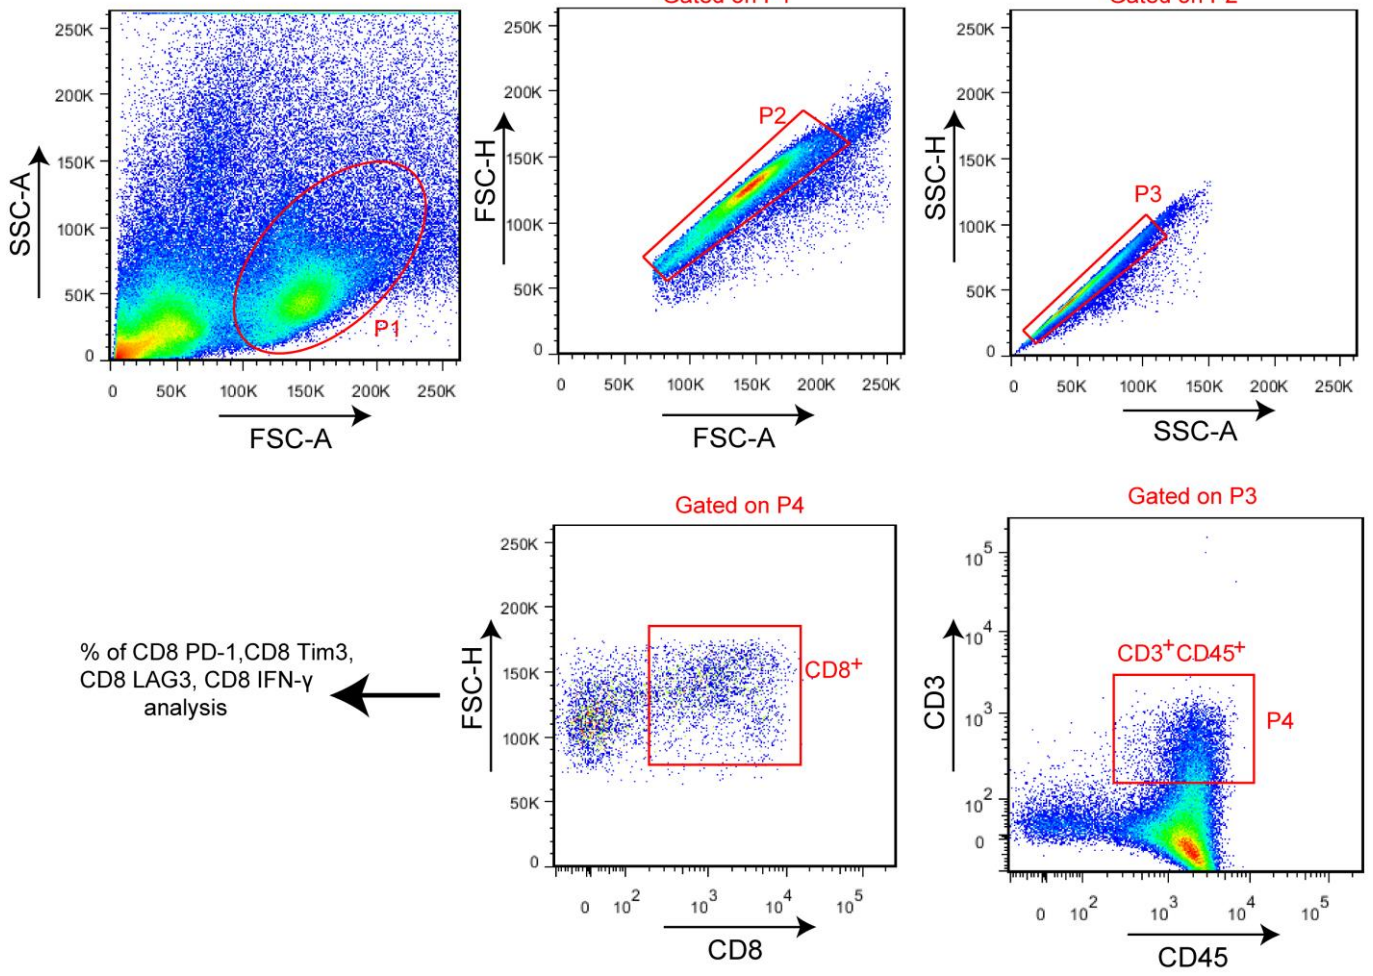



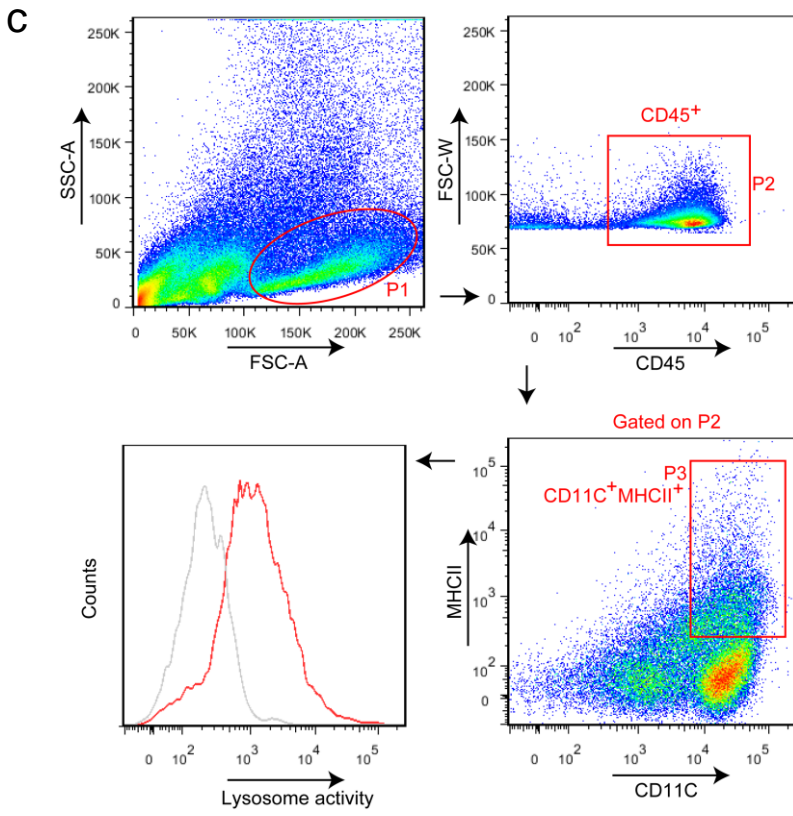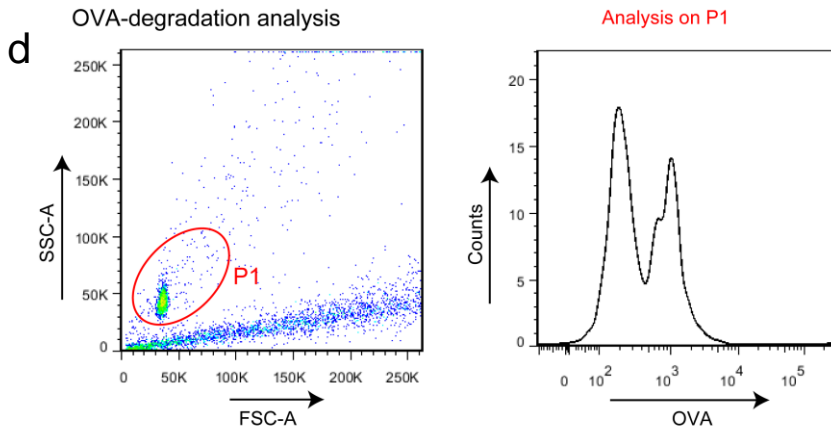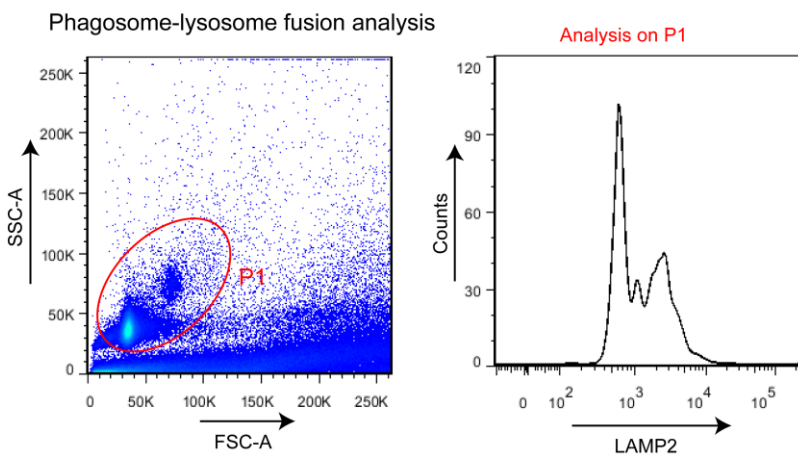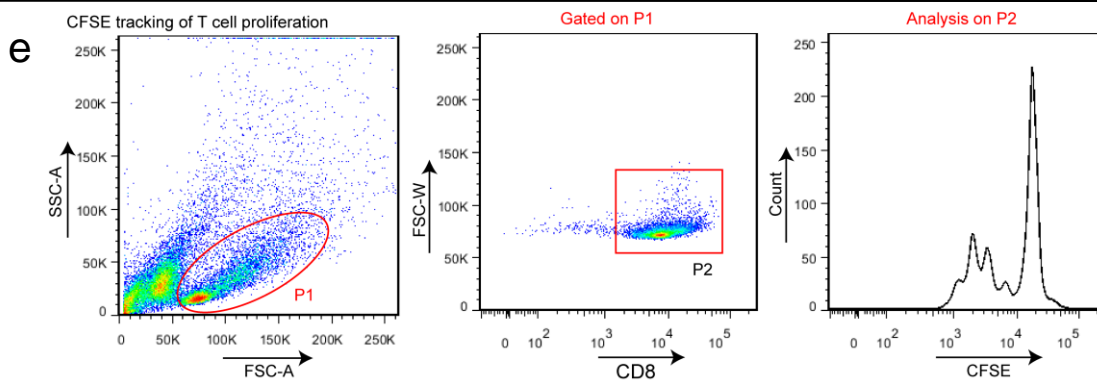

**Supplementary Figure 8. Gating strategies of flow cytometry-related analysis.**

- a. Flow cytometry analysis of Dendritic cells in tumor microenvironment, refers to Fig S1d-e, Fig S6a and 6d-e.
- b. Flow determination of intratumoral T cells, refers to Fig 1h, 6c, 6f, 6h, Fig 7g-h, Fig S1d, Fig S6a, 6d and 6e.
- c. Flow determination of lysosome activity in vitro, refers to Fig 4, Fig 5, Fig S4b-e and Fig S5a-b.
- d. Flow analysis of OVA degradation and phagosome-lysosome fusion in Fig 5f-g.
- e. Flow analysis of T cell proliferation in Fig 3c, d, e and h.

**Supplementary Table 1**

List of oligonucleotides used for qPCR or mouse genotyping

| <b>Oligonucleotides for qPCR:</b>                              | Source        |  |
|----------------------------------------------------------------|---------------|--|
| Human <i>ATF3</i> Forward:<br>CCTGAACAGCGAAGTGTGG              | Sigma-Aldrich |  |
| Human <i>ATF3</i> Reverse:<br>TGGAGAACCCATGAGGTTTCAA           |               |  |
| Human <i>CH25H</i> Forward:<br>GCTACTCTTCGACATGGAGTTC          |               |  |
| Human <i>CH25H</i> Reverse:<br>CAGTTCCCAGACGCTCATATAC          |               |  |
| Human <i>GAPDH</i> Forward:<br>AGGGCTGCTTTTAACTCTGGT           |               |  |
| Human <i>GAPDH</i> Reverse:<br>CCCCACTTGATTTTGGAGGGA           |               |  |
| Mouse <i>ATF3</i> Forward:<br>TTACCGTCAACAACAGACCC             |               |  |
| Mouse <i>ATF3</i> Reverse:<br>TCAGCTCAGCATTCACTC               |               |  |
| Mouse <i>CH25H</i> Forward:<br>TGCTACAACGGTTCGGAGC             |               |  |
| Mouse <i>CH25H</i> Reverse:<br>AGAAGCCCACGTAAGTGATGAT          |               |  |
| Mouse $\beta$ - <i>actin</i> Forward:<br>AGAGGGAAATCGTGCGTGAC  |               |  |
| Mouse $\beta$ - <i>actin</i> Reverse:<br>CAATAGTGATGACCTGGCCGT |               |  |
| Mouse <i>Tfec</i> Forward:<br>GGTCTCACGGATGCTCCTTG             |               |  |
| Mouse <i>Tfec</i> Reverse:<br>TCCAGCGCATATCAGGATCATT           |               |  |
| Mouse <i>Tfeb</i> Forward:<br>CCACCCCAGCCATCAACAC              |               |  |
| Mouse <i>Tfeb</i> Reverse:<br>CAGACAGATACTCCCGAACCTT           |               |  |
| Mouse <i>Creg1</i> Forward:<br>GTGGCACTACTGGTGTGCGC            |               |  |
| Mouse <i>Creg1</i> Reverse:<br>CGCGCACCTCCTTTATTGTG            |               |  |
| Mouse <i>Tef3</i> Forward:<br>TGCCTCAGCAGCTTATGAGG             |               |  |
| Mouse <i>Tef3</i> Reverse:<br>AGACACGCCAATCACAGAGAT            |               |  |
| <b>Oligonucleotides (PCR) for genotyping:</b>                  |               |  |
| <i>Atf3</i> <sup>+/+</sup> Forward:<br>TTCCTGCTAATAGCTCCTG     |               |  |
| <i>Atf3</i> <sup>+/+</sup> Reverse 1:                          |               |  |



|                                                                     |               |
|---------------------------------------------------------------------|---------------|
| TTCATAGCTCAGGGAACATCGG                                              | Sigma-Aldrich |
| <i>Atf3</i> <sup>fl/fl</sup> Reverse 2:<br>CAACTCCCTCTCCTCAAGTC     |               |
| <i>Ch25h</i> <sup>fl/fl</sup> Forward:<br>AAGCCAAGTTAGTGCATTAGGGAA  |               |
| <i>Ch25h</i> <sup>fl/fl</sup> Reverse:<br>CTATATGCTTGGCATGTGTGTCTTC |               |
| <i>CD11c</i> -cre Forward:<br>ACCTAGAGATGTTCGCGATTATCT              |               |
| <i>CD11c</i> -cre Reverse:<br>ACCGTCAGTACGTGAGATATCTT               |               |

Supplementary Table 2

List of antibodies for flow cytometry

| Target         | Isotype              | Conjugate       | Clone       | Company   |
|----------------|----------------------|-----------------|-------------|-----------|
| CD45           | Rat IgG2b, κ         | APC/cy7         | 30-F11      | BioLegend |
| CD45           | Rat IgG2b, κ         | APC             | 30-F11      |           |
| MHC II (IA/IE) | Rat IgG2b, κ         | APC             | M5/114.15.2 |           |
| MHC II (IA/IE) | Rat IgG2b, κ         | PE/Cy7          | M5/114.15.2 |           |
| CD11c          | Armenian Hamster IgG | FITC            | N418        |           |
| CD11c          | Armenian Hamster IgG | PE              | N418        |           |
| CD103          | Armenian Hamster IgG | BV605           | 2E7         |           |
| CD80           | Armenian Hamster IgG | FITC            | 16-10A1     |           |
| CD80           | Armenian Hamster IgG | PE              | 16-10A1     |           |
| CD86           | Rat IgG2a, κ         | PE/CY7          | GL-1        |           |
| CD86           | Rat IgG2a, κ         | APC             | GL-1        |           |
| CD3            | Rat IgG2b, κ         | BV605           | 17A2        |           |
| CD3            | Rat IgG2b,κ          | APC             | 17A2        |           |
| CD3            | Rat IgG2b, κ         | BV421           | 17A2        |           |
| IFN-γ          | Rat IgG1, κ          | PE/Cy7          | XMG1.2      |           |
| Granzyme B     | Mouse IgG1, κ        | Alexa Fluor 700 | QA16A02     |           |
| CD279 (PD1)    | Rat IgG2a, κ         | BV605           | 29F.1A12    |           |
| CD69           | Armenian Hamster IgG | FITC            | H1.2F3      |           |
| Ki67           | Rat IgG2a, κ         | PE              | 16A8        |           |
| CD8            | Rat IgG2a, κ         | APC             | 53-6.7      |           |
| CD8            | Rat IgG2a, κ         | PE/Cy7          | 53-6.7      |           |
| CD8            | Rat IgG2a, κ         | Alexa Fluor 700 | 53-6.7      |           |
| CD8            | Rat IgG2a, κ         | APC/cy7         | 53-6.7      |           |
| CD8            | Rat IgG2b, κ         | FITC            | YTS156.7.7  |           |
| CD8            | Rat IgG2a, κ         | PE              | 53-6.7      |           |
| CD4            | Rat IgG2b, κ         | Alexa Fluor700  | GK1.5       |           |

|              |              |                  |         |                              |
|--------------|--------------|------------------|---------|------------------------------|
| CD366        | Rat IgG1, k  | BV421            | B8.2C12 | Cell Signaling<br>Technology |
| CD223        | Rat IgG1, k  | PE               | C9B7W   |                              |
| F4/80        | Rat IgG2a, κ | BV421            | BM8     |                              |
| CD11b        | Rat IgG2b, κ | Percp/cyanine5.5 | M1/70   |                              |
| Calreticulin | Rabbit IgG   | Alexa Fluor 488  | D3E6    |                              |
